# Supplementary material
Source: MDPI journal article supplement (https://www.mdpi.com/2311-5637/8/1/1)
Supplement: s1 [file s1]

**SUPPLEMENTARY INFORMATION**

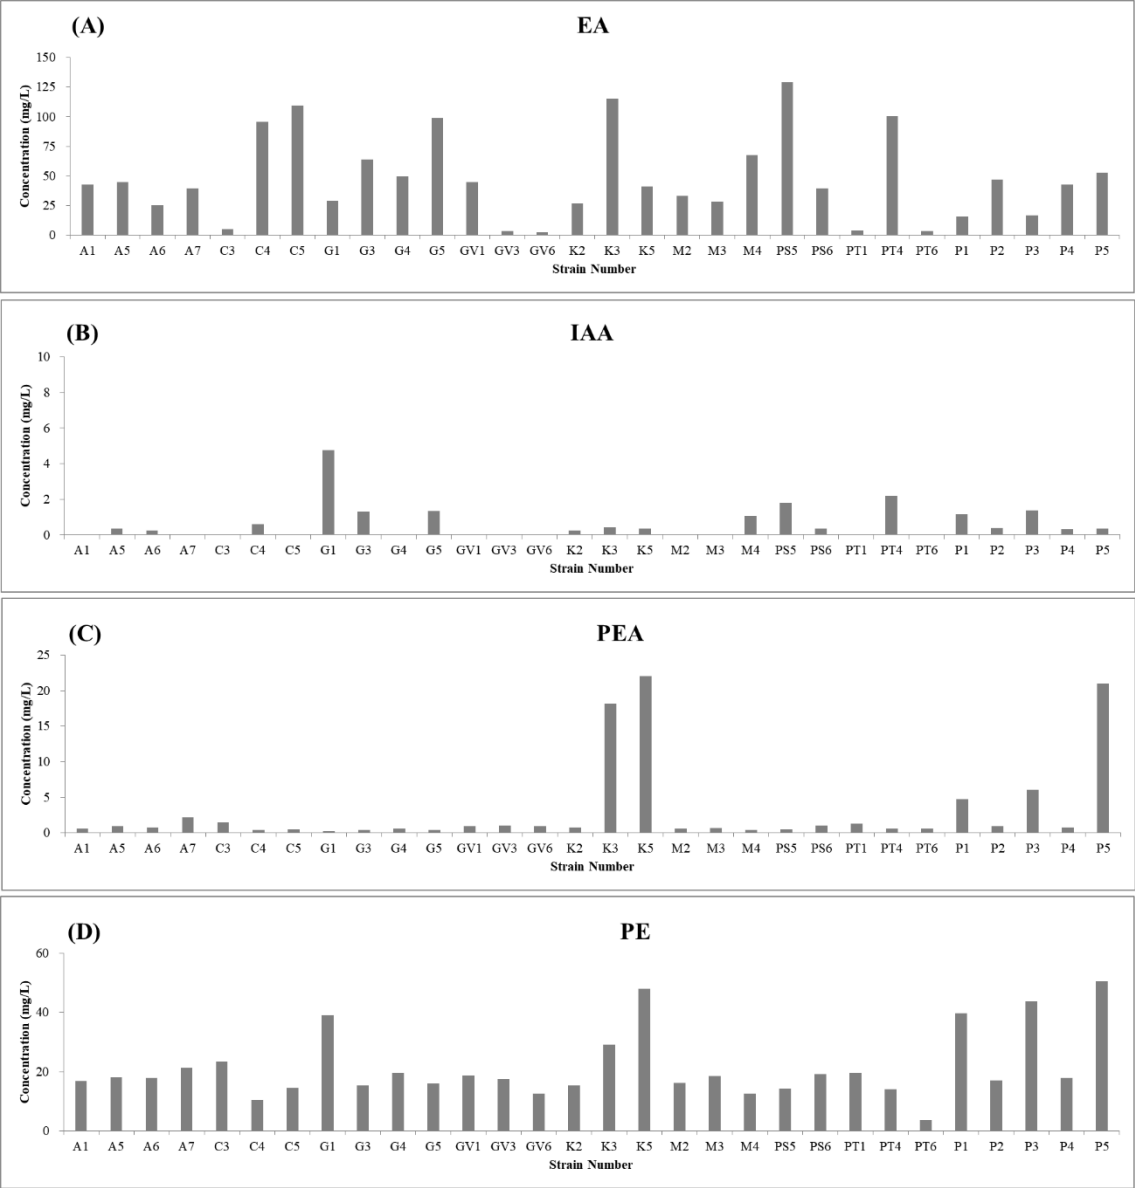

**Supplemental Figure S1.** Screening yeasts by the (A) EA, (B) IAA, (C) PEA and (D) PE of fermented broth.

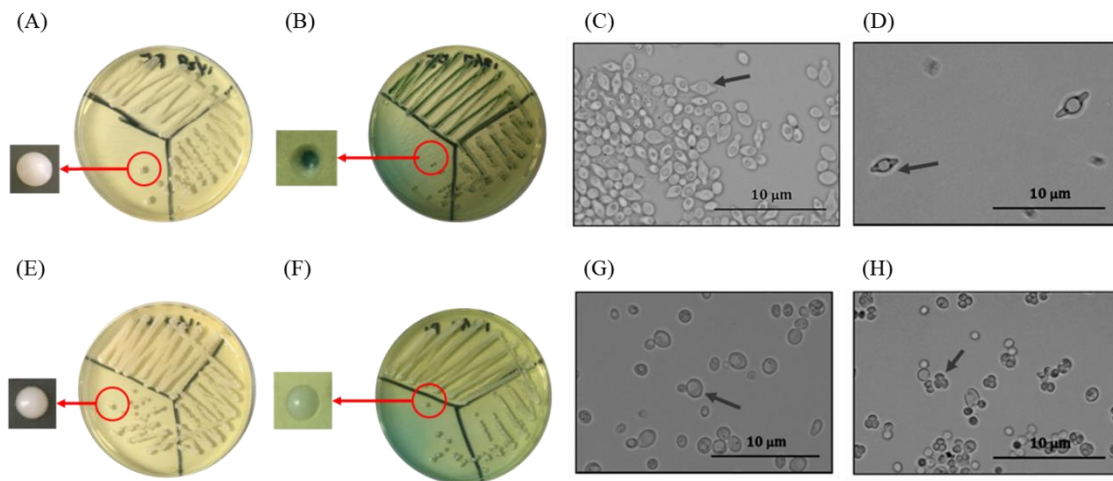

**Supplemental Figure S2.** Morphological characterization of yeasts: (A) *H. vineae* P5 colony on yeast extract peptone dextrose (YPD) agar, (B) *H. vineae* P5 colony on Wallerstein Laboratory (WL) nutrient agar, (C) bipolar budding of *H. vineae* P5, (D) *H. vineae* P5 ascospore, (E) *S. cerevisiae* P1 colony on YPD agar, (F) *S. cerevisiae* P1 colony on WL agar, (G) multilateral budding of *S. cerevisiae* P1 and (H) *S. cerevisiae* P1 ascospore.

*H. vineae* P5 formed smooth, white-to-milky white colonies with slightly raised centers on YPD agar and green colonies with slightly raised centers on WL agar (SFIGs. 2(A) and (B)). *H. vineae* P5 cells were ovoid, lemon, or spindle-shaped, and budded bipolarly (SFIG. 2(C)); furthermore, each *H. vineae* P5 ascus contained 1–2 ascospores during sexual reproduction (SFIG. 2(D)). *S. cerevisiae* P1 formed smooth, white-to-milky white colonies with flat or slightly raised centers on YPD and WL agars (SFIGs. 2(E) and 2(F), respectively). Its cells were spherical or oval and budded multilaterally (SFIG. 2(G)). During sexual reproduction, each *S. cerevisiae* P1 ascus contained 1–4 ascospores (SFIG. 2(H)).

**Supplemental Table S1.** Descriptive terms of check-all-that-apply analysis for cider

| <b>Appearance</b> |              |             |               |             |             |
|-------------------|--------------|-------------|---------------|-------------|-------------|
| clear             | cloudy       | brilliant   | dark          | sediment    | sparkling   |
| pink              | lemon green  | lemon       | straw         | golden      | amber       |
|                   |              | yellow      | yellow        |             |             |
| brown             |              |             |               |             |             |
| <b>Aroma</b>      |              |             |               |             |             |
| fruity            | grapefruit   | lemon       | orange        | cassis      | strawberry  |
| raspberry         | red fruit    | peach       | apple         | cherry      | banana      |
|                   | mix          |             |               |             |             |
| melon             | pineapple    | prune       | passion fruit | mango       | floral      |
| rose              | lilac        | acacia      | violet        | elderflower | jasmine     |
| lavender          | spicy        | tobacco     | tea           | coffee      | soy sauce   |
| nutty             | pepper       | butter      | chocolate     | honey       | caramel     |
| popcorn           | yeasty       | animalic    | leather       | licorice    | vanilla     |
| green/earthy      | smoky        | moldy       | mineralic     | earthy      | hay         |
| asparagus         | green bean   | grass       | bell pepper   | menthol     | woody       |
| mushroom          | meat         | chemical    | plastic       | fuel        | rubbery     |
| sulfur            | glue         | ethanol     | methanol      | solvent     | oxidized    |
| lactic            | vinegar      | corky       |               |             |             |
| <b>Flavor</b>     |              |             |               |             |             |
| sweet             | medium       | dry         | high acidity  | medium      | low acidity |
|                   | sweet        |             |               | acidity     |             |
| high alcohol      | medium       | low alcohol | bitter        |             |             |
|                   | alcohol      |             |               |             |             |
| <b>Texture</b>    |              |             |               |             |             |
| smooth            | pungent      | stinging    | fine bubble   | no bubble   | full-bodied |
| light             | high         | medium      | low           | complex     | burning     |
|                   | astringent   | astringent  | astringent    |             |             |
| <b>Aftertaste</b> |              |             |               |             |             |
| long finish       | short finish | sweet       | acidity       | bitter      | astringent  |
| floral            | fruity       | herb        | woody         |             |             |
| <b>Concept</b>    |              |             |               |             |             |
| comfortable       | good         | expensive   | cheap         |             |             |
|                   | quality      |             |               |             |             |
| <b>Feeling</b>    |              |             |               |             |             |

---

|           |             |           |      |       |        |
|-----------|-------------|-----------|------|-------|--------|
| upset     | degreasing  | freshness | flat | round | robust |
| stomach   |             |           |      |       |        |
| happiness | long length |           |      |       |        |

---

**Supplemental Table S2.** The analysis condition of GC-FID for main aroma compounds

| Parameters            | Condition                                                    |                     |                    |                     |
|-----------------------|--------------------------------------------------------------|---------------------|--------------------|---------------------|
| Column                | DB-WAX, 30 m × 0.25 mm, 0.25 μm (Agilent Technologies, Inc.) |                     |                    |                     |
| Injection volume      | 1 μL                                                         |                     |                    |                     |
| Injection temperature | 180°C                                                        |                     |                    |                     |
| Split ratio           | 30: 1                                                        |                     |                    |                     |
| Flow rate             | He, 1.2 mL/min                                               |                     |                    |                     |
| Oven condition        | Rate<br>(°C/min)                                             | Temperature<br>(°C) | Hold time<br>(min) | Total time<br>(min) |
|                       | -                                                            | 70                  | 0                  | 0                   |
|                       | 5                                                            | 85                  | 0                  | 3                   |
|                       | 45                                                           | 175                 | 0                  | 5                   |
|                       | 2                                                            | 178                 | 0                  | 6.5                 |
|                       | 0.5                                                          | 180                 | 0                  | 10.5                |
|                       | 35                                                           | 250                 | 5                  | 17.5                |
| Detector temperature  | 300°C                                                        |                     |                    |                     |

**Supplemental Table S3.** Yeast identification based on sequencing of the ITS region

| Yeast species                             | No.    | Sources       |
|-------------------------------------------|--------|---------------|
| <i>Candida tropicalis</i>                 | C3     | Cantaloupe    |
| <i>Pichia kudriavzevii</i>                | C5     | Cantaloupe    |
| <i>Hanseniaspora pseudoguilliermondii</i> | A7     | Apple         |
| <i>Hanseniaspora uvarum</i>               | G3     | Grape         |
| <i>Hanseniaspora opuntiae</i>             | C4     | Cantaloupe    |
|                                           | G5     | Grape         |
|                                           | M4     | Mango         |
|                                           | PS5    | Passion fruit |
|                                           | PT4    | Pitaya        |
| <i>Hanseniaspora vineae</i>               | K3、 K5 | Kiwifruit     |
|                                           | P5     | Plum          |
| <i>Saccharomyces cerevisiae</i>           | G1     | Grape         |
|                                           | P1、 P3 | Plum          |

**Supplemental Table S4.** Selection frequencies of descriptive terms for cider and the results of Cochran's Q test based on the check-all-that-apply (CATA) method

| Sample Code       | 138             | 263             | 377             | 924              | <i>p</i> -value |
|-------------------|-----------------|-----------------|-----------------|------------------|-----------------|
| <b>Appearance</b> |                 |                 |                 |                  |                 |
| clear *           | 40 <sup>a</sup> | 12 <sup>b</sup> | 16 <sup>b</sup> | 35 <sup>a</sup>  | 0.00            |
| cloudy *          | 0 <sup>b</sup>  | 21 <sup>a</sup> | 15 <sup>a</sup> | 0 <sup>b</sup>   | 0.00            |
| brilliant *       | 17 <sup>a</sup> | 14 <sup>a</sup> | 18 <sup>a</sup> | 23 <sup>a</sup>  | 0.21            |
| dark              | 0 <sup>a</sup>  | 6 <sup>a</sup>  | 2 <sup>a</sup>  | 1 <sup>a</sup>   | 0.02            |
| sediment          | 0 <sup>a</sup>  | 1 <sup>a</sup>  | 1 <sup>a</sup>  | 0 <sup>a</sup>   | 0.39            |
| sparkling *       | 29 <sup>a</sup> | 2 <sup>b</sup>  | 2 <sup>b</sup>  | 30 <sup>a</sup>  | 0.00            |
| lemon green       | 2 <sup>a</sup>  | 0 <sup>a</sup>  | 0 <sup>a</sup>  | 0 <sup>a</sup>   | 0.11            |
| lemon yellow *    | 14 <sup>a</sup> | 9 <sup>a</sup>  | 8 <sup>a</sup>  | 15 <sup>a</sup>  | 0.15            |
| straw yellow *    | 1 <sup>b</sup>  | 18 <sup>a</sup> | 12 <sup>a</sup> | 2 <sup>b</sup>   | 0.00            |
| golden *          | 17 <sup>a</sup> | 10 <sup>a</sup> | 16 <sup>a</sup> | 20 <sup>a</sup>  | 0.09            |
| amber             | 0 <sup>b</sup>  | 7 <sup>a</sup>  | 7 <sup>a</sup>  | 1 <sup>ab</sup>  | 0.00            |
| <b>Aroma</b>      |                 |                 |                 |                  |                 |
| fruity *          | 38 <sup>a</sup> | 35 <sup>a</sup> | 39 <sup>a</sup> | 36 <sup>a</sup>  | 0.29            |
| grapefruit        | 0 <sup>a</sup>  | 4 <sup>a</sup>  | 2 <sup>a</sup>  | 3 <sup>a</sup>   | 0.27            |
| lemon             | 3 <sup>a</sup>  | 3 <sup>a</sup>  | 2 <sup>a</sup>  | 3 <sup>a</sup>   | 0.96            |
| orange            | 2 <sup>a</sup>  | 6 <sup>a</sup>  | 5 <sup>a</sup>  | 4 <sup>a</sup>   | 0.46            |
| cassis            | 2 <sup>a</sup>  | 2 <sup>a</sup>  | 5 <sup>a</sup>  | 0 <sup>a</sup>   | 0.11            |
| strawberry        | 0 <sup>a</sup>  | 1 <sup>a</sup>  | 1 <sup>a</sup>  | 1 <sup>a</sup>   | 0.80            |
| raspberry         | 0 <sup>a</sup>  | 0 <sup>a</sup>  | 1 <sup>a</sup>  | 3 <sup>a</sup>   | 0.11            |
| red fruit mix     | 0 <sup>a</sup>  | 1 <sup>a</sup>  | 0 <sup>a</sup>  | 0 <sup>a</sup>   | 0.39            |
| peach             | 4 <sup>a</sup>  | 2 <sup>a</sup>  | 2 <sup>a</sup>  | 2 <sup>a</sup>   | 0.75            |
| apple *           | 33 <sup>a</sup> | 22 <sup>b</sup> | 22 <sup>b</sup> | 22 <sup>ab</sup> | 0.01            |
| cherry            | 1 <sup>a</sup>  | 1 <sup>a</sup>  | 1 <sup>a</sup>  | 3 <sup>a</sup>   | 0.52            |
| banana            | 1 <sup>a</sup>  | 0 <sup>a</sup>  | 0 <sup>a</sup>  | 2 <sup>a</sup>   | 0.19            |
| melon             | 1 <sup>a</sup>  | 0 <sup>a</sup>  | 0 <sup>a</sup>  | 1 <sup>a</sup>   | 0.57            |
| pineapple *       | 1 <sup>b</sup>  | 4 <sup>ab</sup> | 9 <sup>a</sup>  | 1 <sup>b</sup>   | 0.00            |
| prune             | 0 <sup>a</sup>  | 2 <sup>a</sup>  | 4 <sup>a</sup>  | 0 <sup>a</sup>   | 0.06            |
| passion fruit     | 0 <sup>a</sup>  | 3 <sup>a</sup>  | 2 <sup>a</sup>  | 0 <sup>a</sup>   | 0.06            |
| mango             | 0 <sup>a</sup>  | 2 <sup>a</sup>  | 5 <sup>a</sup>  | 0 <sup>a</sup>   | 0.02            |
| floral *          | 12 <sup>a</sup> | 14 <sup>a</sup> | 11 <sup>a</sup> | 16 <sup>a</sup>  | 0.60            |
| rose              | 0 <sup>a</sup>  | 0 <sup>a</sup>  | 1 <sup>a</sup>  | 0 <sup>a</sup>   | 0.39            |
| lilac             | 0 <sup>a</sup>  | 0 <sup>a</sup>  | 1 <sup>a</sup>  | 1 <sup>a</sup>   | 0.57            |
| acacia            | 0 <sup>a</sup>  | 0 <sup>a</sup>  | 1 <sup>a</sup>  | 0 <sup>a</sup>   | 0.39            |
| violet            | 1 <sup>a</sup>  | 0 <sup>a</sup>  | 0 <sup>a</sup>  | 0 <sup>a</sup>   | 0.39            |
| elderflower       | 3 <sup>a</sup>  | 2 <sup>a</sup>  | 2 <sup>a</sup>  | 7 <sup>a</sup>   | 0.09            |
| jasmine           | 0 <sup>a</sup>  | 1 <sup>a</sup>  | 1 <sup>a</sup>  | 0 <sup>a</sup>   | 0.57            |

(Continued)

**Supplemental Table S4.** Selection frequencies of descriptive terms for cider and the results of Cochran's Q test based on the check-all-that-apply (CATA) method  
(continued)

| Sample Code    | 138             | 263             | 377              | 924              | <i>p</i> -value |
|----------------|-----------------|-----------------|------------------|------------------|-----------------|
| spicy *        | 11 <sup>b</sup> | 22 <sup>a</sup> | 19 <sup>ab</sup> | 17 <sup>ab</sup> | 0.05            |
| tobacco        | 0 <sup>a</sup>  | 0 <sup>a</sup>  | 1 <sup>a</sup>   | 0 <sup>a</sup>   | 0.39            |
| tea            | 0 <sup>a</sup>  | 1 <sup>a</sup>  | 0 <sup>a</sup>   | 1 <sup>a</sup>   | 0.57            |
| nutty          | 3 <sup>a</sup>  | 0 <sup>a</sup>  | 0 <sup>a</sup>   | 0 <sup>a</sup>   | 0.03            |
| pepper         | 0 <sup>a</sup>  | 0 <sup>a</sup>  | 1 <sup>a</sup>   | 0 <sup>a</sup>   | 0.39            |
| butter         | 4 <sup>a</sup>  | 1 <sup>a</sup>  | 0 <sup>a</sup>   | 3 <sup>a</sup>   | 0.14            |
| honey *        | 3 <sup>ab</sup> | 12 <sup>a</sup> | 12 <sup>a</sup>  | 2 <sup>b</sup>   | 0.00            |
| caramel        | 0 <sup>a</sup>  | 2 <sup>a</sup>  | 3 <sup>a</sup>   | 2 <sup>a</sup>   | 0.34            |
| popcorn        | 0 <sup>a</sup>  | 0 <sup>a</sup>  | 1 <sup>a</sup>   | 1 <sup>a</sup>   | 0.57            |
| yeasty *       | 0 <sup>b</sup>  | 10 <sup>a</sup> | 7 <sup>a</sup>   | 7 <sup>a</sup>   | 0.02            |
| leather        | 0 <sup>a</sup>  | 1 <sup>a</sup>  | 0 <sup>a</sup>   | 0 <sup>a</sup>   | 0.39            |
| licorice       | 0 <sup>a</sup>  | 0 <sup>a</sup>  | 2 <sup>a</sup>   | 2 <sup>a</sup>   | 0.26            |
| vanilla        | 1 <sup>a</sup>  | 0 <sup>a</sup>  | 1 <sup>a</sup>   | 1 <sup>a</sup>   | 0.80            |
| green/earthy * | 7 <sup>a</sup>  | 11 <sup>a</sup> | 9 <sup>a</sup>   | 8 <sup>a</sup>   | 0.62            |
| smoky          | 0 <sup>a</sup>  | 1 <sup>a</sup>  | 0 <sup>a</sup>   | 1 <sup>a</sup>   | 0.57            |
| moldy          | 0 <sup>a</sup>  | 0 <sup>a</sup>  | 0 <sup>a</sup>   | 3 <sup>a</sup>   | 0.03            |
| mineralic      | 1 <sup>a</sup>  | 1 <sup>a</sup>  | 3 <sup>a</sup>   | 2 <sup>a</sup>   | 0.47            |
| earthy         | 2 <sup>a</sup>  | 2 <sup>a</sup>  | 3 <sup>a</sup>   | 2 <sup>a</sup>   | 0.95            |
| hay            | 2 <sup>a</sup>  | 3 <sup>a</sup>  | 1 <sup>a</sup>   | 2 <sup>a</sup>   | 0.75            |
| asparagus      | 0 <sup>a</sup>  | 1 <sup>a</sup>  | 0 <sup>a</sup>   | 0 <sup>a</sup>   | 0.39            |
| grass          | 3 <sup>a</sup>  | 3 <sup>a</sup>  | 1 <sup>a</sup>   | 3 <sup>a</sup>   | 0.71            |
| woody          | 1 <sup>a</sup>  | 2 <sup>a</sup>  | 0 <sup>a</sup>   | 0 <sup>a</sup>   | 0.30            |
| chemical *     | 13 <sup>a</sup> | 26 <sup>a</sup> | 22 <sup>a</sup>  | 24 <sup>a</sup>  | 0.02            |
| plastic        | 0 <sup>a</sup>  | 0 <sup>a</sup>  | 0 <sup>a</sup>   | 1 <sup>a</sup>   | 0.39            |
| fuel           | 0 <sup>a</sup>  | 1 <sup>a</sup>  | 1 <sup>a</sup>   | 0 <sup>a</sup>   | 0.57            |
| rubbery        | 0 <sup>a</sup>  | 0 <sup>a</sup>  | 1 <sup>a</sup>   | 0 <sup>a</sup>   | 0.39            |
| sulfur         | 0 <sup>a</sup>  | 1 <sup>a</sup>  | 1 <sup>a</sup>   | 0 <sup>a</sup>   | 0.57            |
| glue           | 0 <sup>a</sup>  | 1 <sup>a</sup>  | 0 <sup>a</sup>   | 0 <sup>a</sup>   | 0.39            |
| ethanol *      | 5 <sup>a</sup>  | 11 <sup>a</sup> | 9 <sup>a</sup>   | 9 <sup>a</sup>   | 0.33            |
| methanol       | 0 <sup>a</sup>  | 1 <sup>a</sup>  | 0 <sup>a</sup>   | 0 <sup>a</sup>   | 0.39            |
| solvent        | 3 <sup>a</sup>  | 3 <sup>a</sup>  | 2 <sup>a</sup>   | 2 <sup>a</sup>   | 0.93            |
| oxidized       | 0 <sup>a</sup>  | 1 <sup>a</sup>  | 2 <sup>a</sup>   | 0 <sup>a</sup>   | 0.30            |
| lactic         | 1 <sup>a</sup>  | 3 <sup>a</sup>  | 4 <sup>a</sup>   | 7 <sup>a</sup>   | 0.09            |
| vinegar *      | 5 <sup>a</sup>  | 9 <sup>a</sup>  | 8 <sup>a</sup>   | 8 <sup>a</sup>   | 0.61            |
| corky          | 1 <sup>a</sup>  | 1 <sup>a</sup>  | 1 <sup>a</sup>   | 0 <sup>a</sup>   | 0.80            |

(Continued)



**Supplemental Table S4.** Selection frequencies of descriptive terms for cider and the results of Cochran's Q test based on the check-all-that-apply (CATA) method  
(continued)

| Sample Code       | 138             | 263              | 377              | 924             | <i>p</i> -value |
|-------------------|-----------------|------------------|------------------|-----------------|-----------------|
| <b>Flavor</b>     |                 |                  |                  |                 |                 |
| sweet *           | 5 <sup>b</sup>  | 13 <sup>ab</sup> | 19 <sup>a</sup>  | 3 <sup>b</sup>  | 0.00            |
| semi-sweet *      | 25 <sup>a</sup> | 22 <sup>a</sup>  | 16 <sup>a</sup>  | 20 <sup>a</sup> | 0.19            |
| dry *             | 5 <sup>ab</sup> | 0 <sup>b</sup>   | 1 <sup>ab</sup>  | 9 <sup>a</sup>  | 0.00            |
| high acidity      | 3 <sup>a</sup>  | 0 <sup>a</sup>   | 0 <sup>a</sup>   | 4 <sup>a</sup>  | 0.04            |
| medium acidity *  | 13 <sup>a</sup> | 6 <sup>a</sup>   | 4 <sup>a</sup>   | 9 <sup>a</sup>  | 0.07            |
| low acidity *     | 9 <sup>a</sup>  | 11 <sup>a</sup>  | 14 <sup>a</sup>  | 13 <sup>a</sup> | 0.56            |
| medium alcohol *  | 5 <sup>ab</sup> | 11 <sup>a</sup>  | 2 <sup>b</sup>   | 7 <sup>ab</sup> | 0.03            |
| low alcohol *     | 18 <sup>a</sup> | 9 <sup>a</sup>   | 19 <sup>a</sup>  | 11 <sup>a</sup> | 0.03            |
| bitter            | 0 <sup>a</sup>  | 1 <sup>a</sup>   | 1 <sup>a</sup>   | 1 <sup>a</sup>  | 0.80            |
| <b>Texture</b>    |                 |                  |                  |                 |                 |
| smooth *          | 10 <sup>b</sup> | 29 <sup>a</sup>  | 28 <sup>a</sup>  | 8 <sup>b</sup>  | 0.00            |
| pungent *         | 15 <sup>a</sup> | 2 <sup>b</sup>   | 1 <sup>b</sup>   | 17 <sup>a</sup> | 0.00            |
| stinging *        | 16 <sup>a</sup> | 0 <sup>b</sup>   | 0 <sup>b</sup>   | 13 <sup>a</sup> | 0.00            |
| fine bubble *     | 14 <sup>a</sup> | 5 <sup>ab</sup>  | 0 <sup>b</sup>   | 14 <sup>a</sup> | 0.00            |
| no bubble *       | 0 <sup>c</sup>  | 16 <sup>a</sup>  | 10 <sup>ab</sup> | 5 <sup>bc</sup> | 0.00            |
| full-bodied       | 0 <sup>b</sup>  | 7 <sup>a</sup>   | 6 <sup>ab</sup>  | 2 <sup>ab</sup> | 0.01            |
| light *           | 17 <sup>a</sup> | 9 <sup>a</sup>   | 9 <sup>a</sup>   | 13 <sup>a</sup> | 0.16            |
| high astringent   | 0 <sup>a</sup>  | 0 <sup>a</sup>   | 1 <sup>a</sup>   | 3 <sup>a</sup>  | 0.11            |
| medium astringent | 2 <sup>a</sup>  | 3 <sup>a</sup>   | 1 <sup>a</sup>   | 7 <sup>a</sup>  | 0.09            |
| low astringent *  | 17 <sup>a</sup> | 15 <sup>a</sup>  | 7 <sup>a</sup>   | 12 <sup>a</sup> | 0.07            |
| complex           | 2 <sup>a</sup>  | 2 <sup>a</sup>   | 1 <sup>a</sup>   | 0 <sup>a</sup>  | 0.53            |
| burning           | 1 <sup>a</sup>  | 4 <sup>a</sup>   | 1 <sup>a</sup>   | 1 <sup>a</sup>  | 0.23            |
| <b>Aftertaste</b> |                 |                  |                  |                 |                 |
| long finish *     | 11 <sup>a</sup> | 9 <sup>a</sup>   | 10 <sup>a</sup>  | 11 <sup>a</sup> | 0.94            |
| short finish *    | 14 <sup>a</sup> | 14 <sup>a</sup>  | 15 <sup>a</sup>  | 15 <sup>a</sup> | 0.99            |
| sweet *           | 7 <sup>b</sup>  | 21 <sup>a</sup>  | 16 <sup>ab</sup> | 8 <sup>b</sup>  | 0.00            |
| acidity *         | 17 <sup>a</sup> | 6 <sup>b</sup>   | 5 <sup>b</sup>   | 23 <sup>a</sup> | 0.00            |
| bitter            | 0 <sup>a</sup>  | 3 <sup>a</sup>   | 2 <sup>a</sup>   | 2 <sup>a</sup>  | 0.39            |
| astringent *      | 4 <sup>a</sup>  | 4 <sup>a</sup>   | 8 <sup>a</sup>   | 11 <sup>a</sup> | 0.09            |
| floral *          | 1 <sup>a</sup>  | 1 <sup>a</sup>   | 5 <sup>a</sup>   | 2 <sup>a</sup>  | 0.19            |
| fruity *          | 22 <sup>a</sup> | 18 <sup>a</sup>  | 19 <sup>a</sup>  | 16 <sup>a</sup> | 0.55            |
| herb              | 0 <sup>a</sup>  | 1 <sup>a</sup>   | 1 <sup>a</sup>   | 1 <sup>a</sup>  | 0.80            |
| woody             | 2 <sup>a</sup>  | 0 <sup>a</sup>   | 1 <sup>a</sup>   | 1 <sup>a</sup>  | 0.57            |

(Continued)

**Supplemental Table S4.** Selection frequencies of descriptive terms for cider and the results of Cochran's Q test based on the check-all-that-apply (CATA) method (continued)

| Sample Code    | 138             | 263             | 377              | 924              | <i>p</i> -value |
|----------------|-----------------|-----------------|------------------|------------------|-----------------|
| <b>Concept</b> |                 |                 |                  |                  |                 |
| comfortable *  | 25 <sup>a</sup> | 25 <sup>a</sup> | 24 <sup>a</sup>  | 19 <sup>a</sup>  | 0.43            |
| good quality * | 13 <sup>a</sup> | 12 <sup>a</sup> | 7 <sup>a</sup>   | 17 <sup>a</sup>  | 0.08            |
| expensive      | 0 <sup>a</sup>  | 1 <sup>a</sup>  | 2 <sup>a</sup>   | 1 <sup>a</sup>   | 0.49            |
| cheap          | 11 <sup>a</sup> | 10 <sup>a</sup> | 16 <sup>a</sup>  | 12 <sup>a</sup>  | 0.43            |
| <b>Feeling</b> |                 |                 |                  |                  |                 |
| upset stomach  | 0 <sup>a</sup>  | 0 <sup>a</sup>  | 0 <sup>a</sup>   | 1 <sup>a</sup>   | 0.39            |
| degreasing *   | 16 <sup>a</sup> | 5 <sup>bc</sup> | 2 <sup>c</sup>   | 14 <sup>ab</sup> | 0.00            |
| freshness *    | 23 <sup>a</sup> | 11 <sup>b</sup> | 12 <sup>ab</sup> | 22 <sup>ab</sup> | 0.01            |
| flat *         | 6 <sup>a</sup>  | 5 <sup>a</sup>  | 12 <sup>a</sup>  | 5 <sup>a</sup>   | 0.11            |
| round *        | 2 <sup>c</sup>  | 19 <sup>a</sup> | 13 <sup>ab</sup> | 3 <sup>bc</sup>  | 0.00            |
| robust *       | 3 <sup>a</sup>  | 5 <sup>a</sup>  | 8 <sup>a</sup>   | 3 <sup>a</sup>   | 0.23            |
| happiness *    | 3 <sup>a</sup>  | 7 <sup>a</sup>  | 9 <sup>a</sup>   | 4 <sup>a</sup>   | 0.10            |
| long length    | 0 <sup>b</sup>  | 7 <sup>a</sup>  | 3 <sup>ab</sup>  | 3 <sup>ab</sup>  | 0.02            |

Significant difference ( $p < 0.05$ ) of panelists' selection proportions for each attribute among the four cider samples were determined by Cochran's Q test. 138 = Somersby Apple Cider; 263 = Pure culture ; 377 = Co-culture; 924 = Strongbow Gold Apple Cider.
